# Supplementary material for: Dynamic Characteristics and Chloride Resistance of Basalt and Polypropylene Fibers Reinforced Recycled Aggregate Concrete
Source: Hindawi journal article supplement (doi:10.1155/2020/6029047), 2020-06-02
Supplement: f1 [file 6029047.f1.doc]

**“Data Availability”statement**

The data used to support the findings of this study are included within the article.

1. The nature of the data is average of three test results;
2. The data can be accessed in my paper including air void content, slump, mechanical properties, dynamic modulus of elasticity, damping ratio and Charge passed of RAC;
3. There is no restrictions on data access in my paper.

Table 1 Air void content and slump value of concrete.

| Concrete ID | Air void content (%) | Slump (mm) |
| --- | --- | --- |
| R | 1.7 | 140 |
| 50RAC | 1.9 | 150 |
| 100RAC | 2.3 | 165 |
| 50RAC-PP-0.1 | 1.6 | 120 |
| 50RAC-PP-0.2 | 1.5 | 105 |
| 50RAC-PP-0.3 | 1.3 | 85 |
| 50RAC-BF-0.1 | 1.8 | 140 |
| 50RAC-BF-0.2 | 1.6 | 125 |
| 50RAC-BF-0.3 | 1.5 | 110 |

Table 2 Mechanical properties of concrete.

| Concrete ID | Compressive strength (MPa) | | | | Flexural strength (MPa) | | | |
| --- | --- | --- | --- | --- | --- | --- | --- | --- |
| 7d | ± SD | 28d | ± SD | 7d | ± SD | 28d | ± SD |
| R | 55.87 | 0.34 | 65.72 | 0.81 | 8.39 | 0.22 | 10.12 | 0.28 |
| 50RAC | 43.04 | 0.34 | 59.43 | 1.22 | 7.71 | 0.11 | 8.87 | 0.22 |
| 100RAC | 38.37 | 0.31 | 45.14 | 1.22 | 5.87 | 0.13 | 7.05 | 0.23 |
| 50RAC-PP-0.1 | 43.83 | 0.30 | 51.81 | 1.03 | 8.630 | 0.14 | 9.97 | 0.25 |
| 50RAC-PP-0.2 | 41.41 | 0.24 | 49.78 | 1.24 | 8.587 | 0.15 | 10.3 | 0.13 |
| 50RAC-PP-0.3 | 39.15 | 0.32 | 48.12 | 1.10 | 8.555 | 0.16 | 9.95 | 0.25 |
| 50RAC-BF-0.1 | 51.07 | 0.32 | 60.31 | 0.90 | 8.87 | 0.18 | 10.32 | 0.12 |
| 50RAC-BF-0.2 | 47.15 | 0.21 | 55.24 | 0.84 | 8.67 | 0.20 | 10.21 | 0.33 |
| 50RAC-BF-0.3 | 40.27 | 0.30 | 49.49 | 0.84 | 8.42 | 0.21 | 9.91 | 0.38 |

Table 3 Dynamic properties of concrete.

| Concrete ID | 28d Dynamic modulus of elasticity  (GPa ) | ± SD | 28d Damping ratio  (% ) | ±SD |
| --- | --- | --- | --- | --- |
| R | 49.85 | 0.30 | 0.75 | 0.03 |
| 50RAC | 46.58 | 0.32 | 1.57 | 0.02 |
| 100RAC | 40.31 | 0.31 | 1.98 | 0.02 |
| 50RAC-PP-0.1 | 44.21 | 0.35 | 1.89 | 0.04 |
| 50RAC-PP-0.2 | 42.21 | 0.32 | 1.91 | 0.01 |
| 50RAC-PP-0.3 | 41.97 | 0.34 | 2.30 | 0.02 |
| 50RAC-BF-0.1 | 45.55 | 0.24 | 1.67 | 0.03 |
| 50RAC-BF-0.2 | 43.21 | 0.34 | 1.85 | 0.01 |
| 50RAC-BF-0.3 | 42.38 | 0.31 | 1.97 | 0.03 |

Table 4 Charge passed of concrete.

| Concrete ID | 28d (C) |
| --- | --- |
| R | 1810 |
| 50RAC | 2443 |
| 100RAC | 3230 |
| 50RAC-PP-0.1 | 2661 |
| 50RAC-PP-0.2 | 2987 |
| 50RAC-PP-0.3 | 3595 |
| 50RAC-BF-0.1 | 2499 |
| 50RAC-BF-0.2 | 2875 |
| 50RAC-BF-0.3 | 3210 |
